# Supplementary material
Source: Springer Nature journal article supplement (https://www.springermedizin.de/resource/supplementary/12885_2014_4733_MOESM1_ESM.pdf/9467134)

**A**

Relative miRNA expression

miR-34b

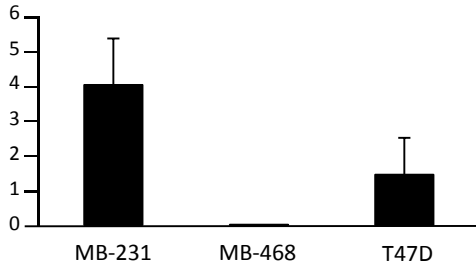**B**

Relative miRNA expression

miR-34c

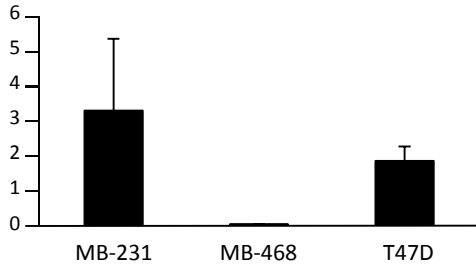

Supplement: MOESM1 [file 9467134]
